# Supplementary material for: Measuring sustainability of seed-funded earth science informatics projects
Source: PLOS journal article supplement (doi:10.1371/journal.pone.0222807), 2019-10-23
Supplement: S1 (10.1371/journal.pone.0222807.s001) [file journal.pone.0222807.s001]

## S1 Table. Projects funded by the USGS Community for Data Integration between 2010 and 2016.

Further details on each project can be found at <http://www.usgs.gov/cdi>.

| ID       | Title                                                                                                                                     |
|----------|-------------------------------------------------------------------------------------------------------------------------------------------|
| FP10-BD  | Geo Data Portal                                                                                                                           |
| FP10-BS  | Added to the National Map: Web Services for the National Hydrography Dataset, National Elevation Dataset and National Land Cover Dataset  |
| FP10-HS  | NWIS Web Services Snapshot for ArcGIS                                                                                                     |
| FP10-KT  | Data Upload, Registry and Access Project (a capability of ScienceBase)                                                                    |
| FP11-FJ  | Science Data Lifecycle Model                                                                                                              |
| FP11-HV1 | Data Management Website                                                                                                                   |
| FP11-HV2 | Data Management Training and Education                                                                                                    |
| FP11-HV3 | Data Management Workshop                                                                                                                  |
| FP11-KT1 | Enhanced Metadata Capability for CBI Metadata Tool-ScienceBase                                                                            |
| FP11-KT2 | FGDC-ISO Remapping for CBI Metadata Tool-ScienceBase                                                                                      |
| FP12-AJ  | Implementing an OpenLayers HTML5 Mapping Library                                                                                          |
| FP12-BD  | Geo Data Portal - ScienceBase/GDP, Python port for GDP                                                                                    |
| FP12-BT  | USGS Science Center Adaptable Data Management Plan Implementation and Framework                                                           |
| FP12-DR  | Expand the National Map Save As/Open In to USGS Wide                                                                                      |
| FP12-GJ  | Semantic Technologies for Integrating USGS Data                                                                                           |
| FP12-HM  | USGS Citizen Science Workshop                                                                                                             |
| FP12-MD  | Mobile application to collect national consistent data of fish passage barriers in the United States                                      |
| FP12-MD2 | Citizen Science Observation Platform - Using Curated Twitter and GeoRSS Enabled Feeds                                                     |
| FP12-SJ  | Facilitating Knowledge Integration with a Monitoring Protocol Registry                                                                    |
| FP12-SL  | USGS Mobile Applications Development Support Framework                                                                                    |
| FP13-BA  | Evaluation of downscaled General Circulation Model (GCM) output for current conditions and associated error in simulated runoff for CONUS |
| FP13-BD  | Establishing the Land Use Land Cover Geo Data Portal and Supporting Data Services                                                         |
| FP13-EA  | Mining the USGS Data Landscape                                                                                                            |
| FP13-FG  | Development of Enhanced Feature Recognition Software for the Extraction of Mine Features from USGS Topographic Maps                       |
| FP13-FL  | Networking the California Climate Commons with the USGS Geo Data Portal                                                                   |

|         |                                                                                                                                                       |
|---------|-------------------------------------------------------------------------------------------------------------------------------------------------------|
| FP13-HC | National Land Cover Database Visualization and Information Tool                                                                                       |
| FP13-HS | myScience: USGS Citizen Science Project Discovery & Public Engagement Web Application                                                                 |
| FP13-HV | Data Management Workshops for USGS: Let the Culture Change Begin                                                                                      |
| FP13-ID | Metadata Wizard: An Easy-to-Use Tool for FGDC Metadata Creation in ESRI's ArcGIS Software                                                             |
| FP13-SD | USGS Protocol Library: An Implementation Based on the National Environmental Methods Index                                                            |
| FP14-DR | Summarization of National NEXRAD Data for use in Biological Applications                                                                              |
| FP14-EL | North American Bat Data Integration                                                                                                                   |
| FP14-FP | NASWeb API Web Services Access to the Nonindigenous Aquatic Species Database                                                                          |
| FP14-GM | Characterization of Earthquake Damage and Effects Using Social Media Data                                                                             |
| FP14-LF | Use of Controlled Vocabularies in USGS Information Applications: Requirements Analysis for Automated Processes and Services (Bureau-wide Application) |
| FP14-LJ | Online Merging and Gridding of Topographic and Bathymetric Data Sources                                                                               |
| FP14-LR | Adopt a Pixel - Data Infrastructure                                                                                                                   |
| FP14-SR | Geographic Searches for USGS Publications (Bureau-wide Application)                                                                                   |
| FP14-SS | Portable ISO 19115-2 Open Source Developer's Toolkit (Bureau-wide Application)                                                                        |
| FP15-BD | The 'Digital Grain Size' Web and Mobile-Computing Application                                                                                         |
| FP15-DJ | National Dam Removal Database: A living database for information on dying dams                                                                        |
| FP15-GT | Geocaching Natural Features - Applying Game Mechanics to Citizen Science Data Collection                                                              |
| FP15-LJ | Making Unmanned Aircraft System (UAS) Data Available to USGS Scientists and the Public                                                                |
| FP15-LR | Web-enabled Visualization and Access of Value-added Disaster Products                                                                                 |
| FP15-RP | Standards-based Integration and Delivery of USGS and EPA STORET Biomonitoring Data via the Water Quality Data Portal                                  |
| FP15-SC | Integration of Land Cover Trends Field Photography with an Online Map Service                                                                         |
| FP15-WL | sbtools: An R package for ScienceBase                                                                                                                 |
| FP16-CK | Development of Recommended Practices and Workflow for Publishing Digital Data through ScienceBase for Dynamic Visualization                           |
| FP16-EA | Developing a USGS Legacy Data Inventory to Preserve and Release Historical USGS Data                                                                  |
| FP16-GM | Crowd-Sourced Earthquake Detections Integrated into Seismic Processing                                                                                |
| FP16-JJ | A data management and visualization framework for community vulnerability to hazards                                                                  |
| FP16-MS | Hunting Invasive Species with HTCondor: High Throughput Computing for Big Data and Next Generation Sequencing                                         |
| FP16-NJ | Data Management Training Clearinghouse                                                                                                                |
| FP16-PT | Birds and the Bakken: Integration of oil well, land cover, and species distribution data to inform conservation in areas of energy development        |

|         |                                                                                                                                                     |
|---------|-----------------------------------------------------------------------------------------------------------------------------------------------------|
| FP16-SE | Integration of National Soil and Wetland Datasets: A Toolkit for Reproducible Calculation and Quality Assessment of Imputed Wetland Soil Properties |
| FP16-SJ | A web-based application for the management and visualization of land-use scenario data                                                              |
| FP16-SR | Evaluating a new open-source, standards-based framework for web portal development in the geosciences                                               |
| FP16-TC | Facilitating the USGS Scientific Data Management Foundation by integrating the process into current scientific workflow systems                     |
| FP16-WD | National Stream Summarization: Standardizing Stream-Landscape Summaries                                                                             |
| FP16-WJ | Integration of Phenological Forecast Maps for Assessment of Biodiversity: An Enterprise Workflow                                                    |

Supporting information for Hsu, Hutchison, and Langseth, Measuring sustainability of seed-funded Earth science informatics projects.
